# Supplementary material
Source: Springer Nature journal article supplement (https://www.springermedizin.de/resource/supplementary/12889_2011_3966_MOESM6_ESM.pdf/9491164)
Supplement: MOESM6 [file 9491164]

Table 3 Odds ratios (OR) for use of antidepressants in participants living alone compared to participants not living alone, separately for men and women. Data: The Health 2000 Study, n = 3471

| Predictor: living alone<br>(ref.=not alone) | Use of antidepressant medication |             |                         |             |                                  |             |   |
|---------------------------------------------|----------------------------------|-------------|-------------------------|-------------|----------------------------------|-------------|---|
|                                             | At baseline                      |             | During 7-year follow-up |             | Incident 7-year use <sup>a</sup> |             | % |
|                                             | OR (95% CI)                      | % reduction | OR (95% CI)             | % reduction | OR (95% CI)                      | % reduction |   |
| Adjustment in addition to age and gender:   |                                  |             |                         |             |                                  |             |   |
| Men (n=1695)                                |                                  |             |                         |             |                                  |             |   |
| 1.None                                      | 1.85 (1.06-3.25)                 | 0           | 1.72 (1.21-2.44)        | 0           | 1.62 (1.09-2.41)                 | 0           |   |
| 2.Psychosocial factors <sup>b</sup>         | 1.59 (0.89-2.83)                 | 31          | 1.57 (1.09-2.25)        | 21          | 1.53 (1.02-2.29)                 | 15          |   |
| 3.Sociodemographic factors <sup>c</sup>     | 1.73 (0.96-3.09)                 | 14          | 1.65 (1.15-2.37)        | 10          | 1.62 (1.08-2.43)                 | 0           |   |
| 4.Health behaviors <sup>d</sup>             | 1.81 (1.03-3.18)                 | 5           | 1.64 (1.15-2.34)        | 11          | 1.56 (1.04-2.33)                 | 10          |   |
| 5.All of the above                          | 1.56 (0.86-2.85)                 | 34          | 1.51 (1.04-2.20)        | 29          | 1.52 (1.00-2.31)                 | 16          |   |
| Women (n=1776)                              |                                  |             |                         |             |                                  |             |   |
| Adjustment in addition to age and gender:   |                                  |             |                         |             |                                  |             |   |
| 1.None                                      | 1.54 (1.00-2.39)                 | 0           | 1.89 (1.40-2.54)        | 0           | 1.74 (1.24-2.45)                 | 0           |   |
| 2.Psychosocial factors <sup>b</sup>         | 1.43 (0.91-2.22)                 | 20          | 1.81 (1.34-2.45)        | 9           | 1.71 (1.21-2.42)                 | 4           |   |
| 3.Sociodemographic factors <sup>c</sup>     | 1.41 (0.89-2.22)                 | 24          | 1.65 (1.21-2.25)        | 27          | 1.51 (1.05-2.15)                 | 31          |   |
| 4.Health behaviors <sup>d</sup>             | 1.50 (0.97-2.32)                 | 7           | 1.83 (1.36-2.46)        | 7           | 1.70 (1.20-2.39)                 | 5           |   |
| 5.All of the above                          | 1.29 (0.80-2.06)                 | 46          | 1.58 (1.15-2.17)        | 35          | 1.49 (1.03-2.14)                 | 34          |   |

<sup>a</sup> New users during the follow-up with no purchases at the baseline (in 2000 or 2001).

<sup>b</sup> Low social support at the workplace, low social support in private life, poor job climate, hostile personality.

<sup>c</sup> Low educational level, low occupational grade, low income, unemployment, urbanicity, living at rent, housing disadvantages.

<sup>d</sup> Regular smoking, alcohol heavy use (>20g women, >40g men), sedentary lifestyle, obesity (BMI >30)
